# Supplementary material for: A rapid and clean synthetic approach to cyclic peptides via micro-flow peptide chain elongation and photochemical cyclization: synthesis of a cyclic RGD peptide
Source: Royal Society of Chemistry journal article supplement (doi:10.1039/c6ob02391f), 2016-01-01

**Supporting Information**

**A Rapid and Clean Synthetic Approach for Cyclic Peptides via  
Micro-flow Peptide Chain Elongation and Photochemical Cyclization:  
Synthesis of Cyclic RGD Peptide**

Yuto Mifune, Hiroyuki Nakamura and Shinichiro Fuse\*

*Laboratory for Chemistry and Life Science, Institute of Innovative Research, Tokyo Institute of Technology,  
4259 Nagatsuta-cho, Midori-ku, Yokohama 226-8503, Japan. E-mail: sfuse@res.titech.ac.jp*

Table of Contents

|                             |     |
|-----------------------------|-----|
| 1. Micro-flow reactor setup | S-2 |
| 2. NMR spectra              | S-4 |

## 1. Micro-flow reactor setup

The employed micro-flow system for amide bond formation is shown in Figure S-1. Stainless steel T-shape mixers were purchased from Sanko Seiki Co. Ltd. (inner diameter: 0.25 mm). Teflon<sup>®</sup> tube with inner diameter 0.8 mm was purchased from Senshu Scientific Co. Ltd. The T-shape mixers and Teflon<sup>®</sup> tube were connected with PEEK fittings purchased from GL Science Co. Ltd. Solutions were introduced to micro-flow system with the syringe pumps (Harvard Pump 11 and Harvard PHD ULTRA) equipped gastight syringes (SGE). The gastight syringes and Teflon<sup>®</sup> tube were connected with joints purchased from Techno Applications Co. Ltd. The gastight syringes and T-shape mixers 1 and 2 were connected with Teflon<sup>®</sup> tube (inner diameter: 0.8 mm, length: 800 mm, volume 402  $\mu$ L). T-shape mixers 1 and 2 were connected with reaction tube 1 (Teflon<sup>®</sup> tube). T-shape mixer 2 was connected with reaction tube 2 (Teflon<sup>®</sup> tube). The reaction tube 2 and Teflon<sup>®</sup> tube (inner diameter: 0.25 mm, length 100 mm, volume 5  $\mu$ L) were connected to generate back pressure. T-shape mixers and reaction tube were immersed in water bath.

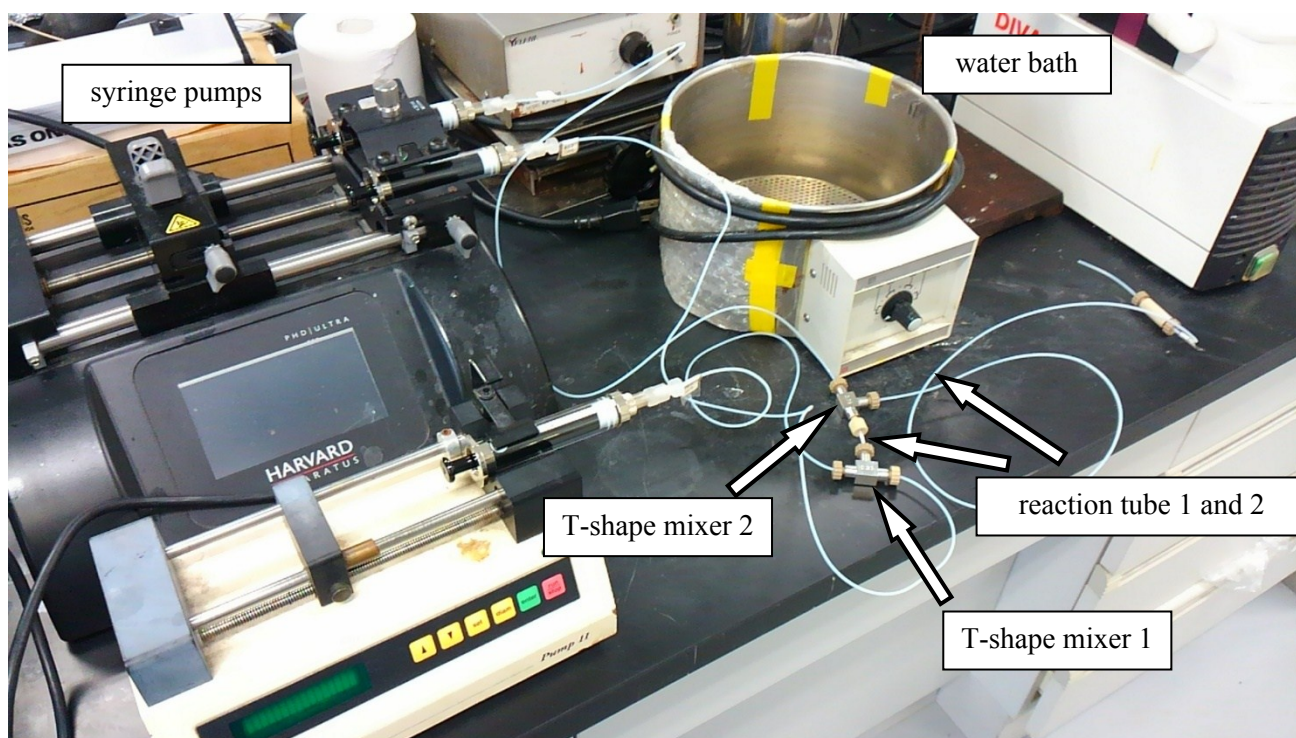

Figure S-1

The employed micro-flow system for photochemical cyclization is shown in Figure S-2. 9 W UV lamp (wavelength: 365 nm) were purchased from AS ONE Co., Ltd. A fluorinated ethylene propylene copolymer (FEP) tube (Flon Industry Co., Ltd., inner diameter: 1.0 mm) was used as the tube reactor. The tube reactor was tightly wrapped around the lamp. Solution was introduced to the micro-flow system via syringe pump (Harvard PHD ULTRA) equipped with gastight syringe (SGE). The reactor and gastight syringe were connected by PEEK tubing (inner diameter: 0.5 mm). The tube reactor and lamp were wrapped in aluminum foil (not shown in figure).

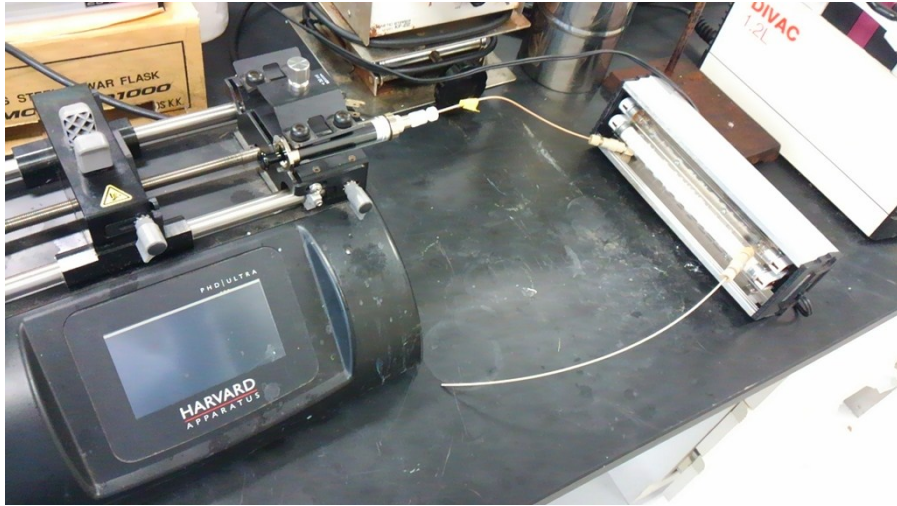

Figure S-2

## 2. NMR spectra

### 5-bromo-7-nitroindoline (Bni) (9)

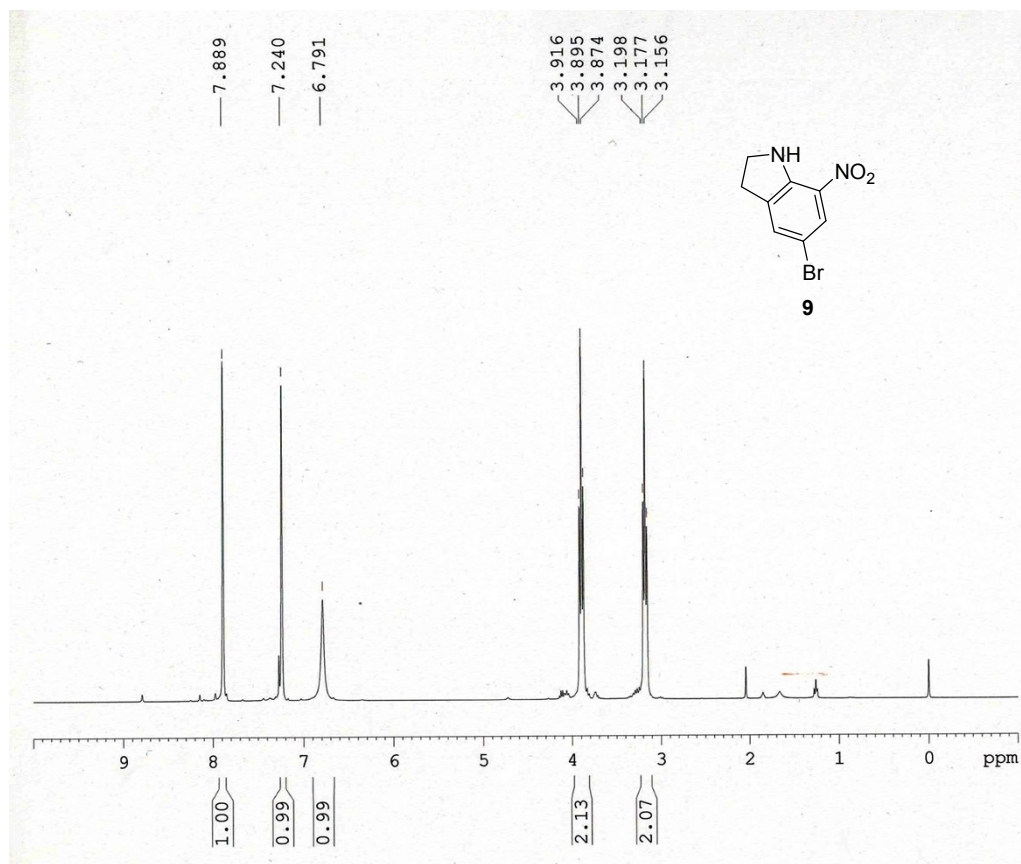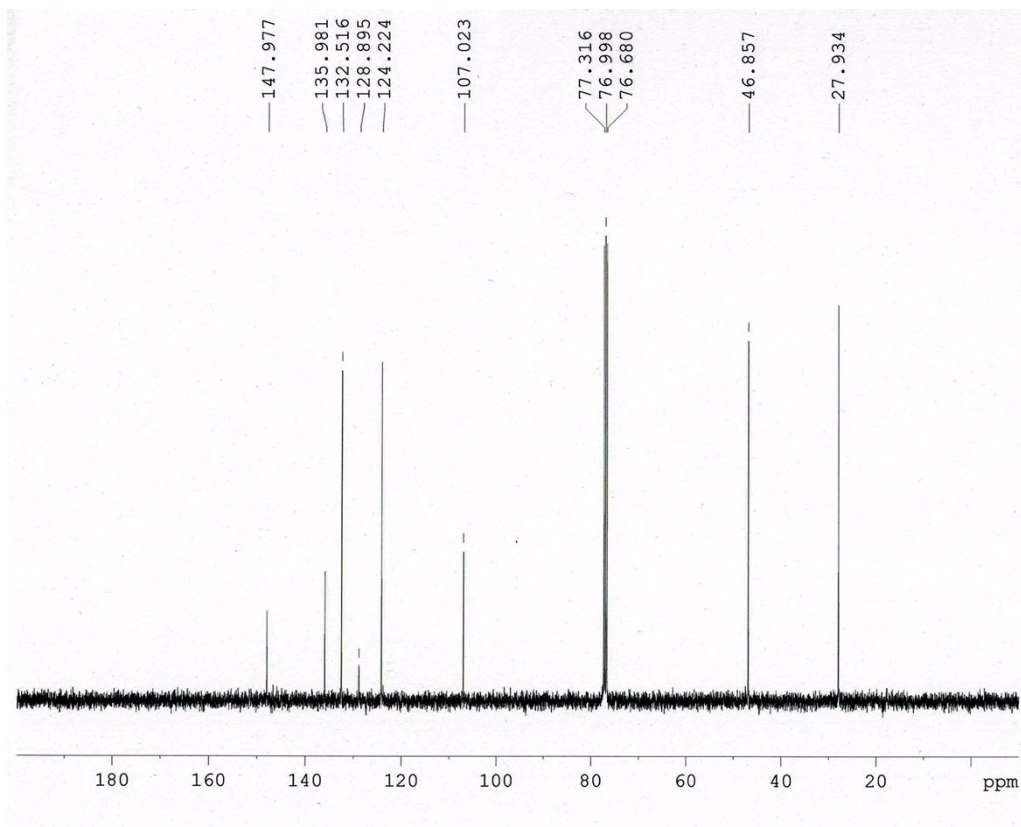

# Bni-protected *N*-Fmoc-glycine 10

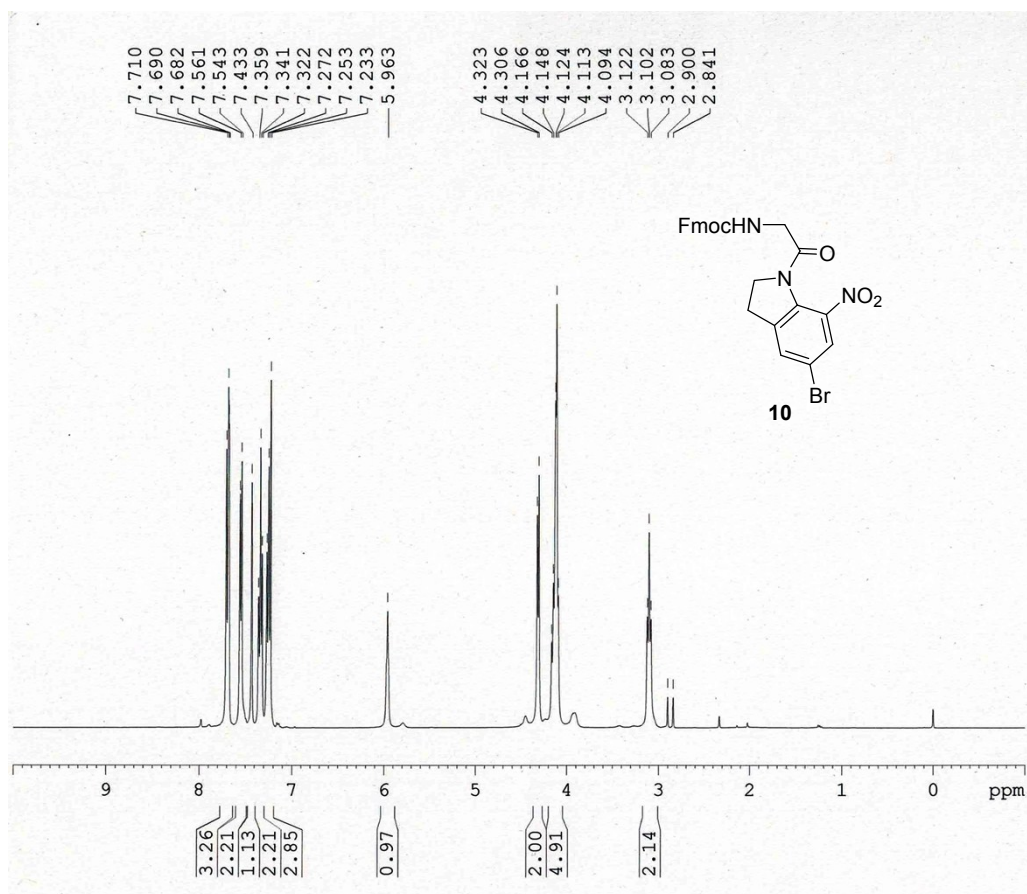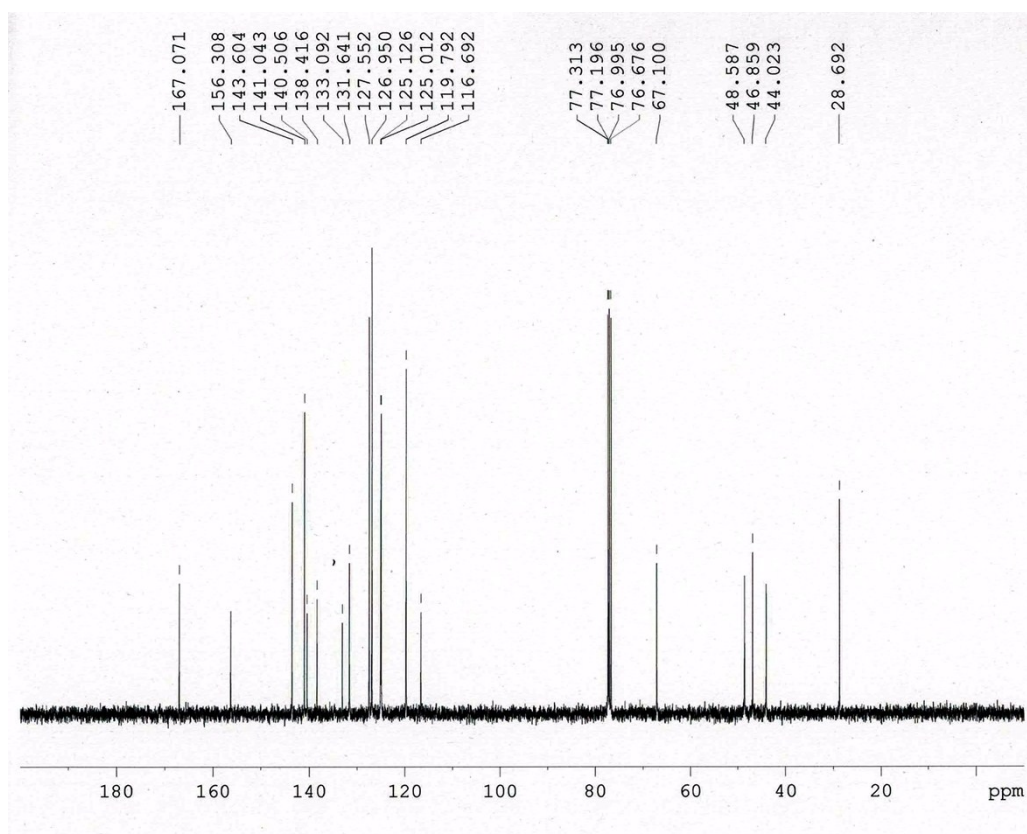

Pentapeptide 22

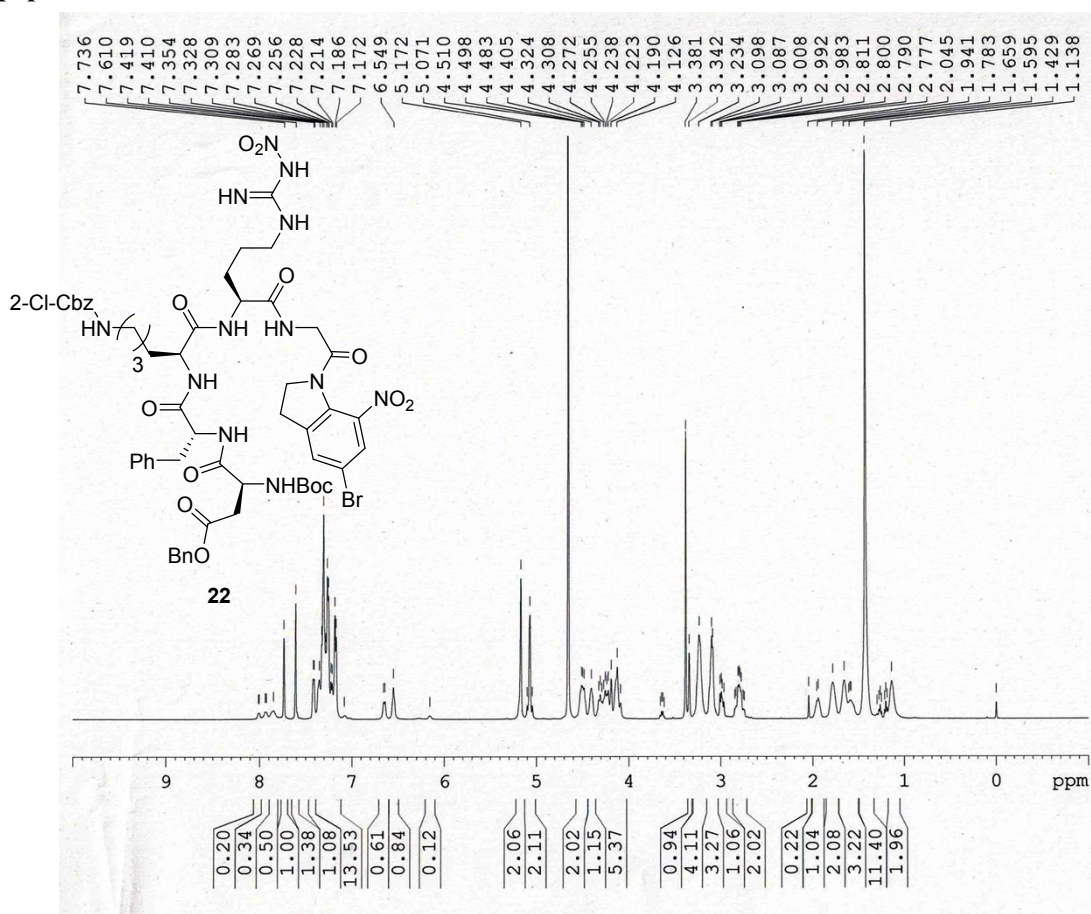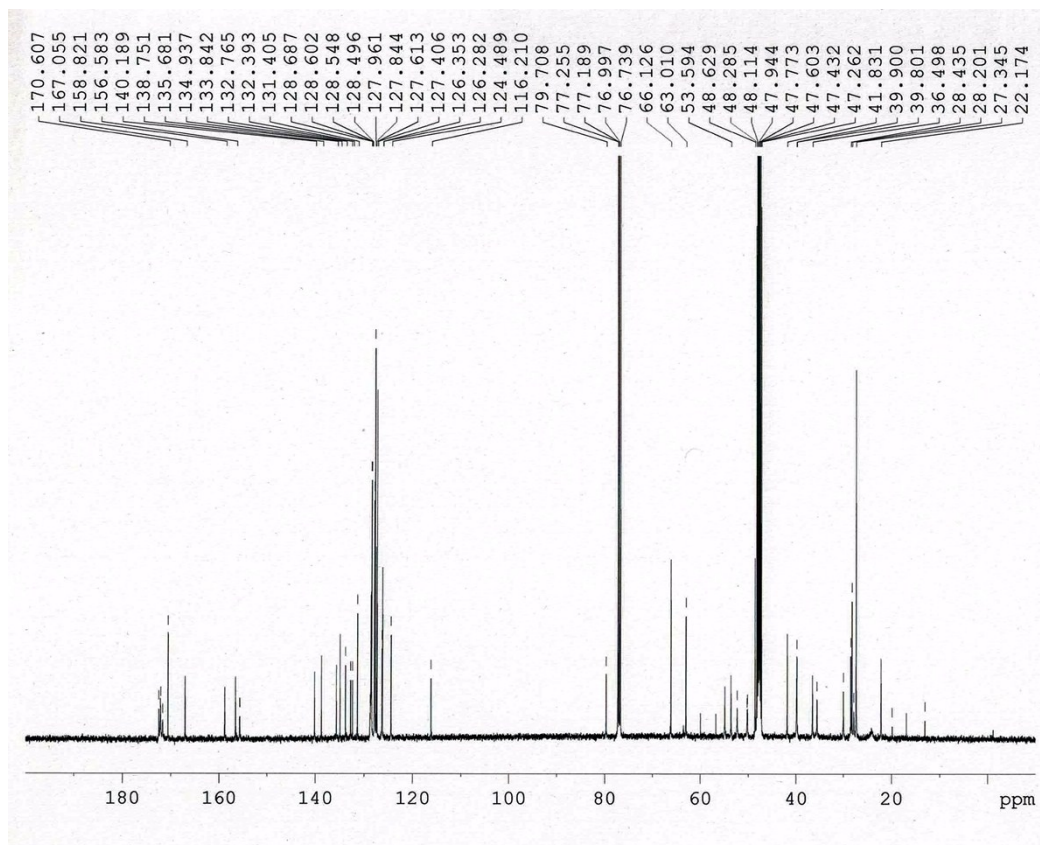

(<sup>1</sup>H-<sup>1</sup>H COSY)

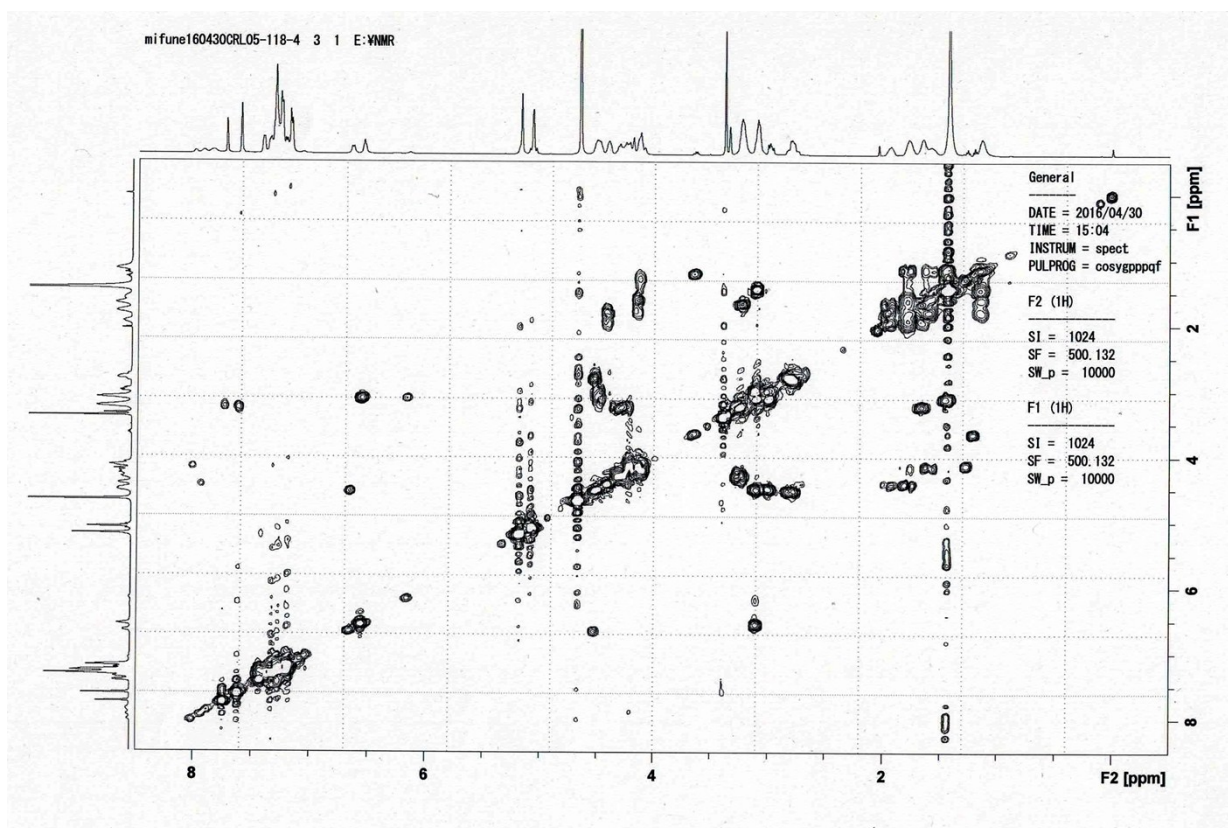

(HSQC)

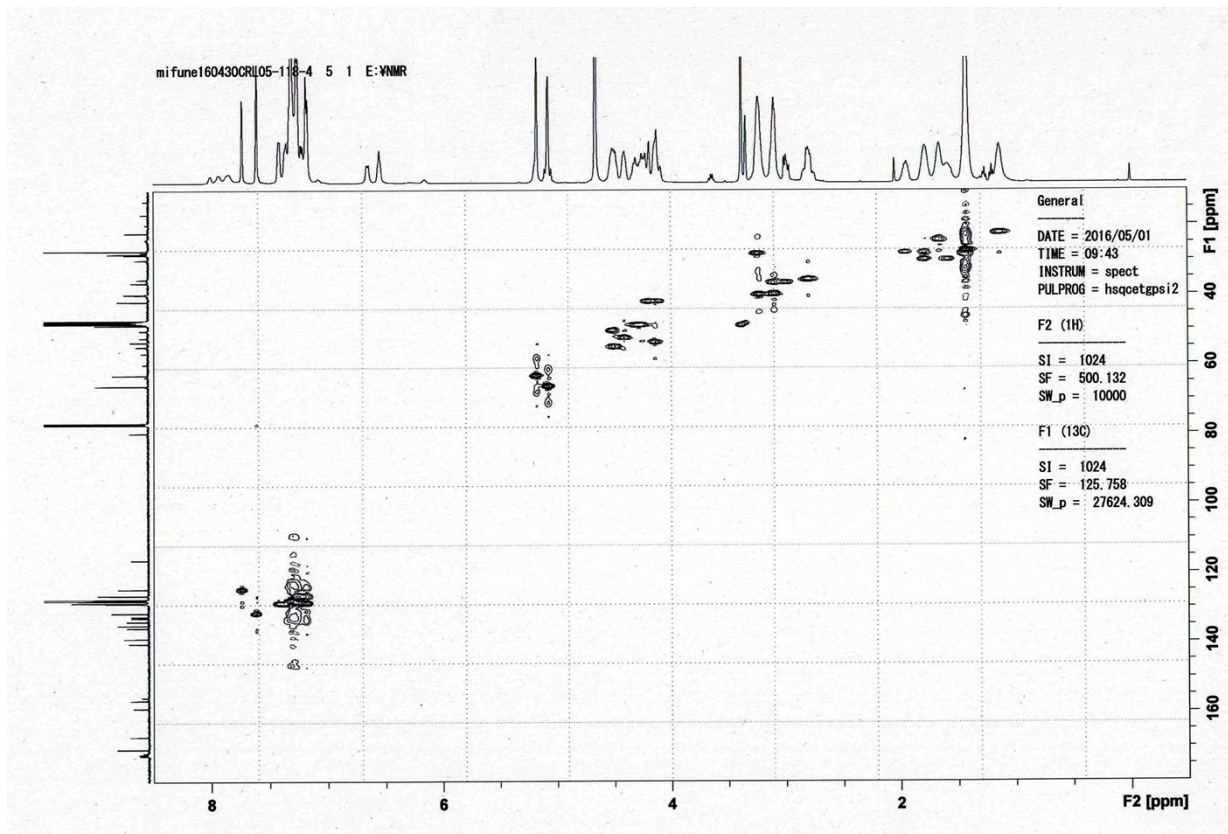

(HMBC)

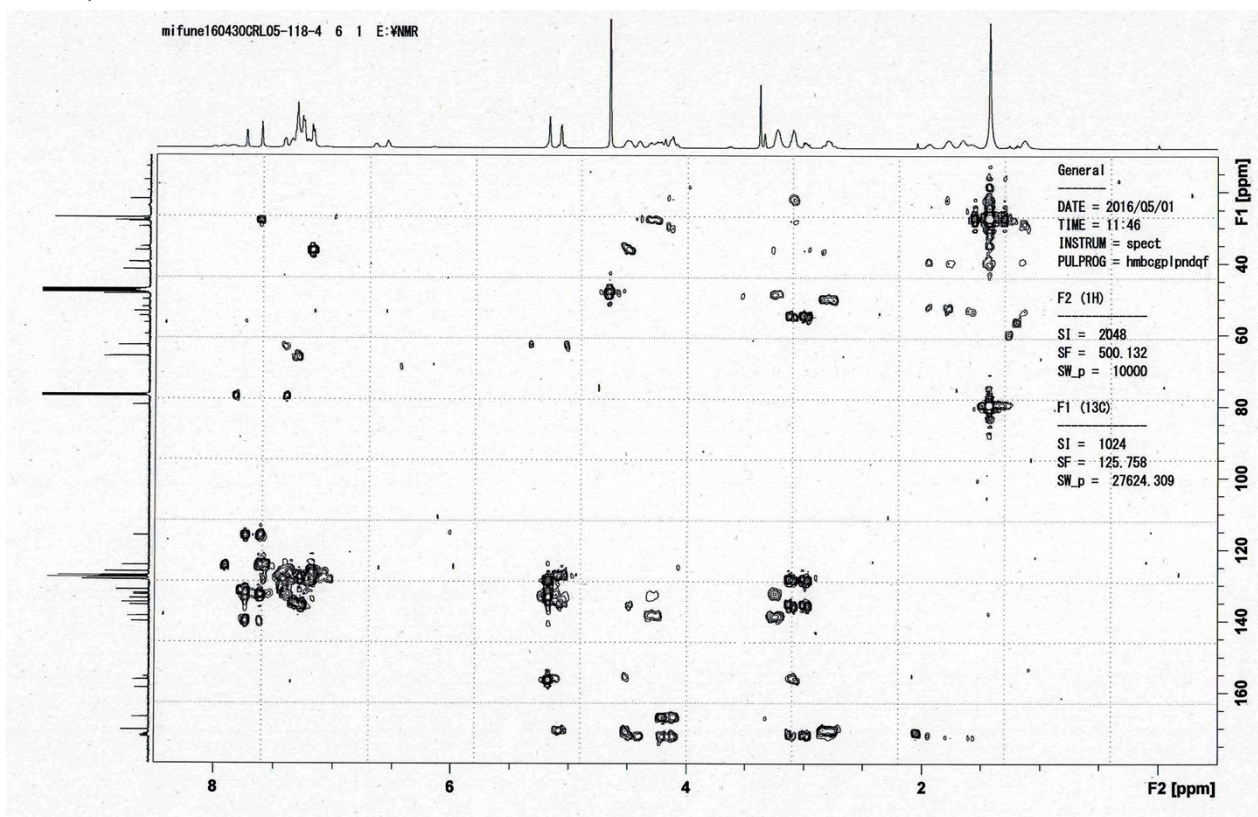



cyclic pentapeptide 24

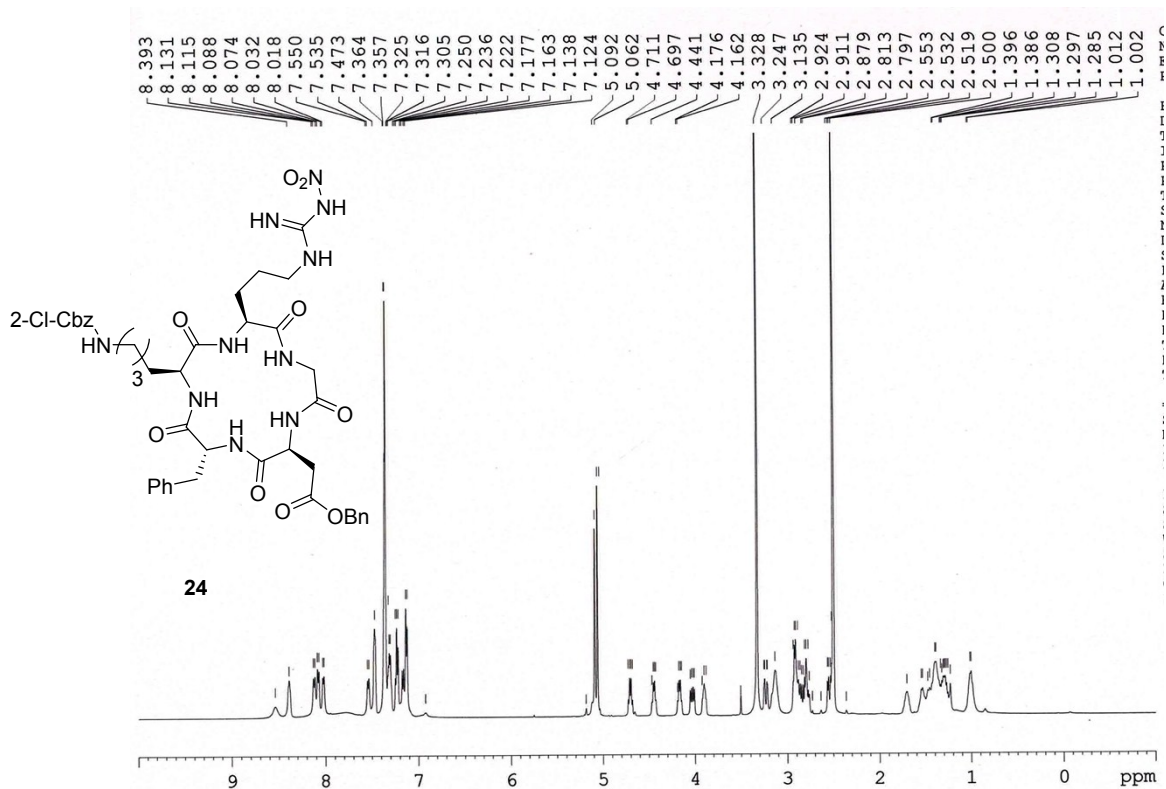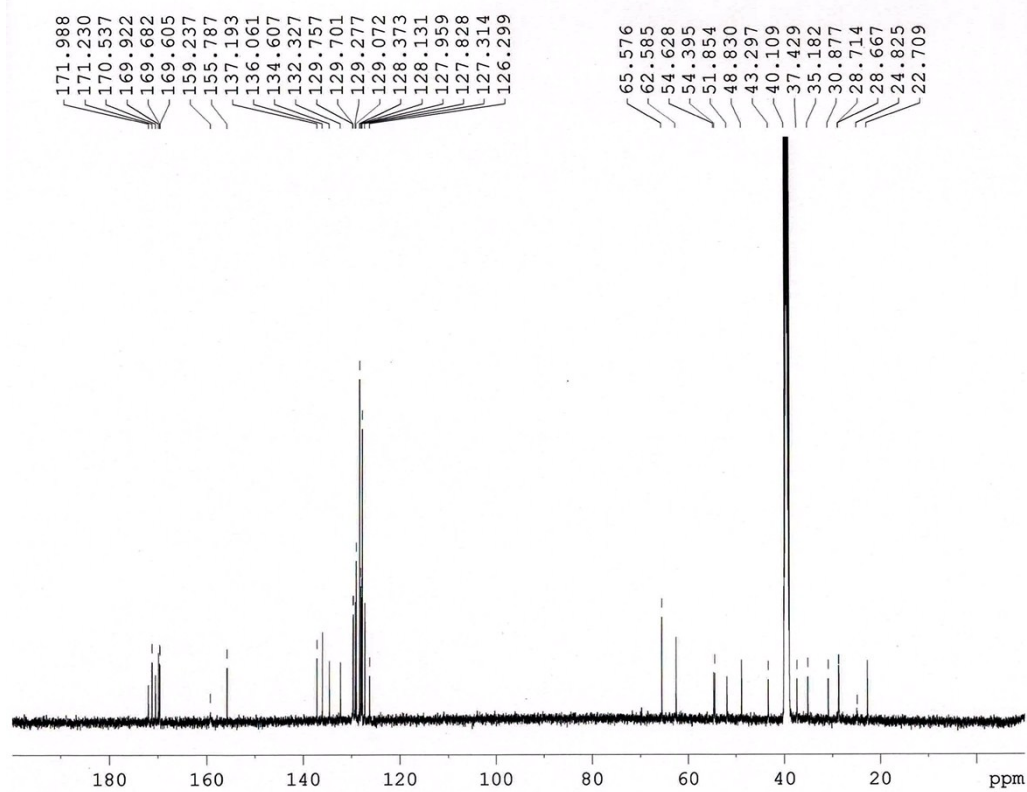

(<sup>1</sup>H-<sup>1</sup>H COSY)

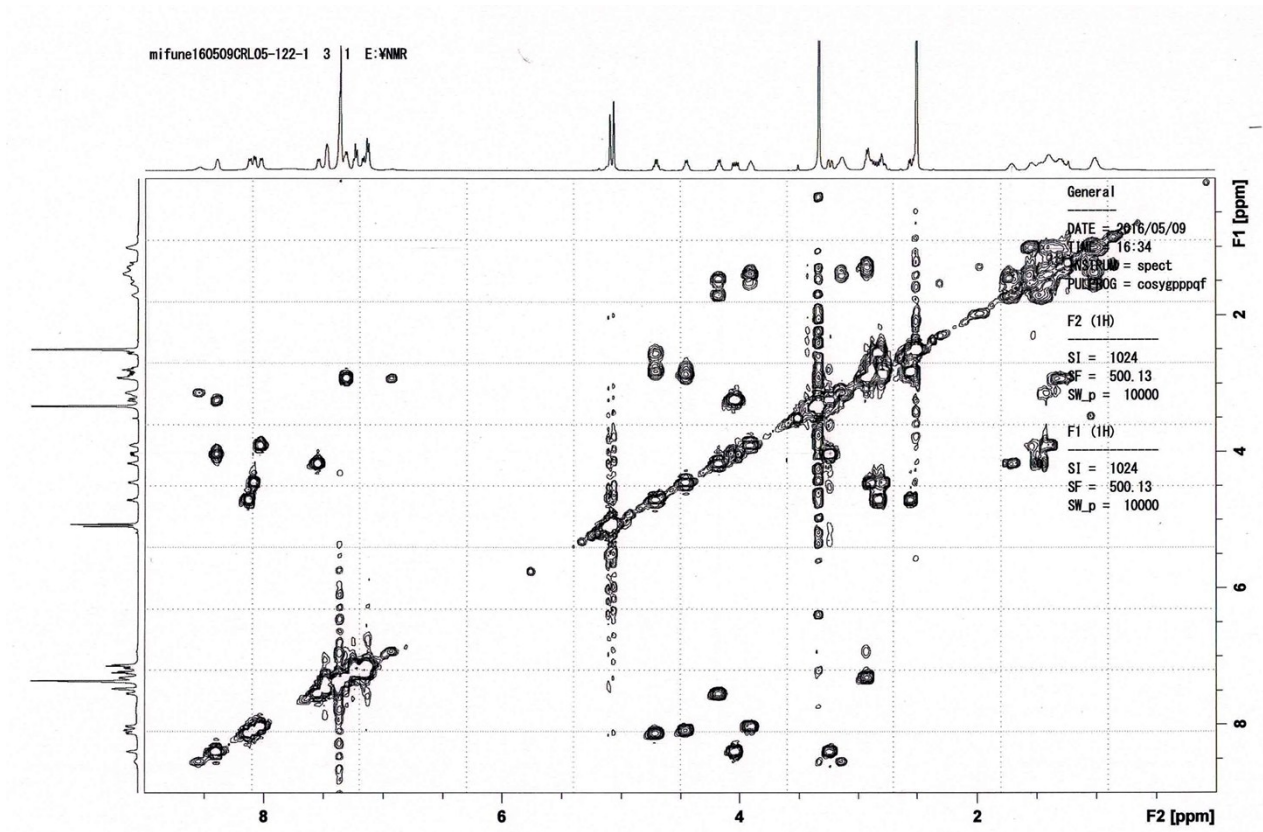

(HSQC)

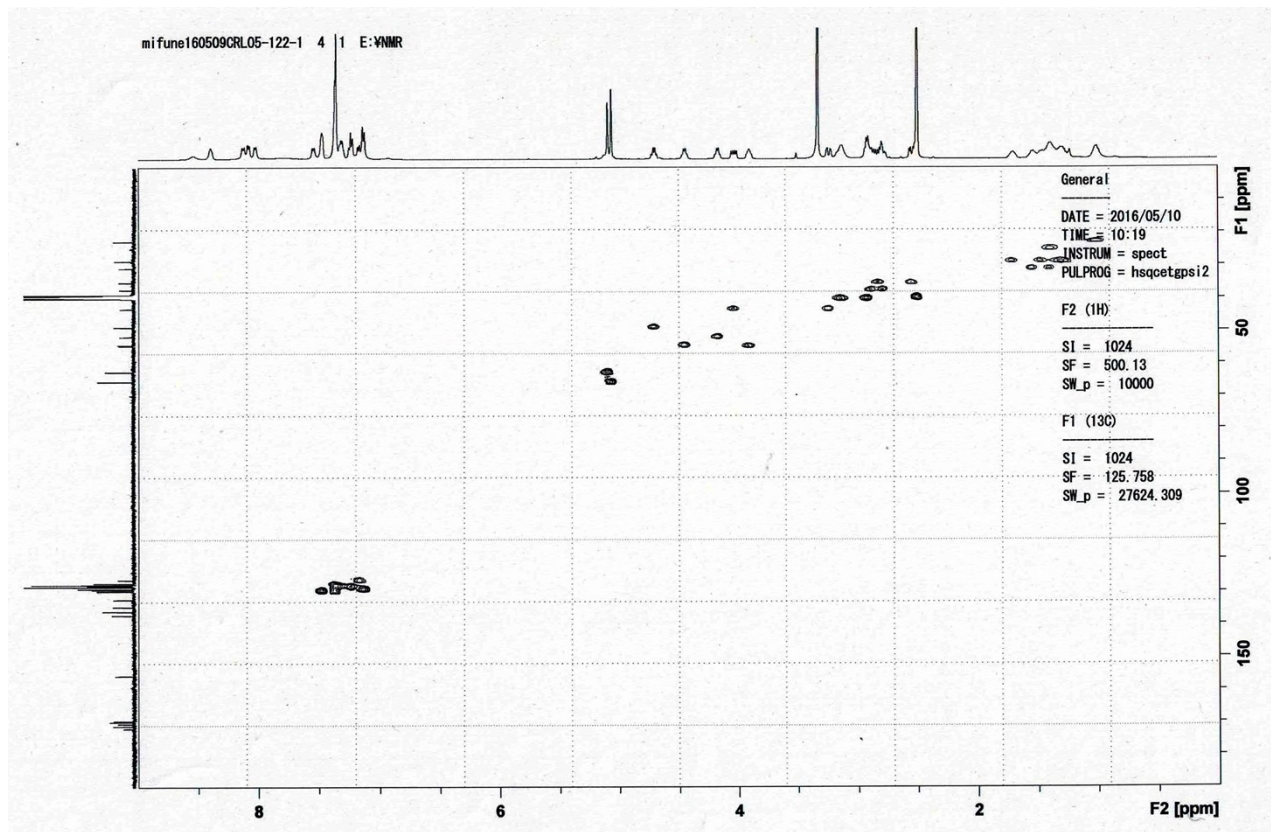

(HMBC)

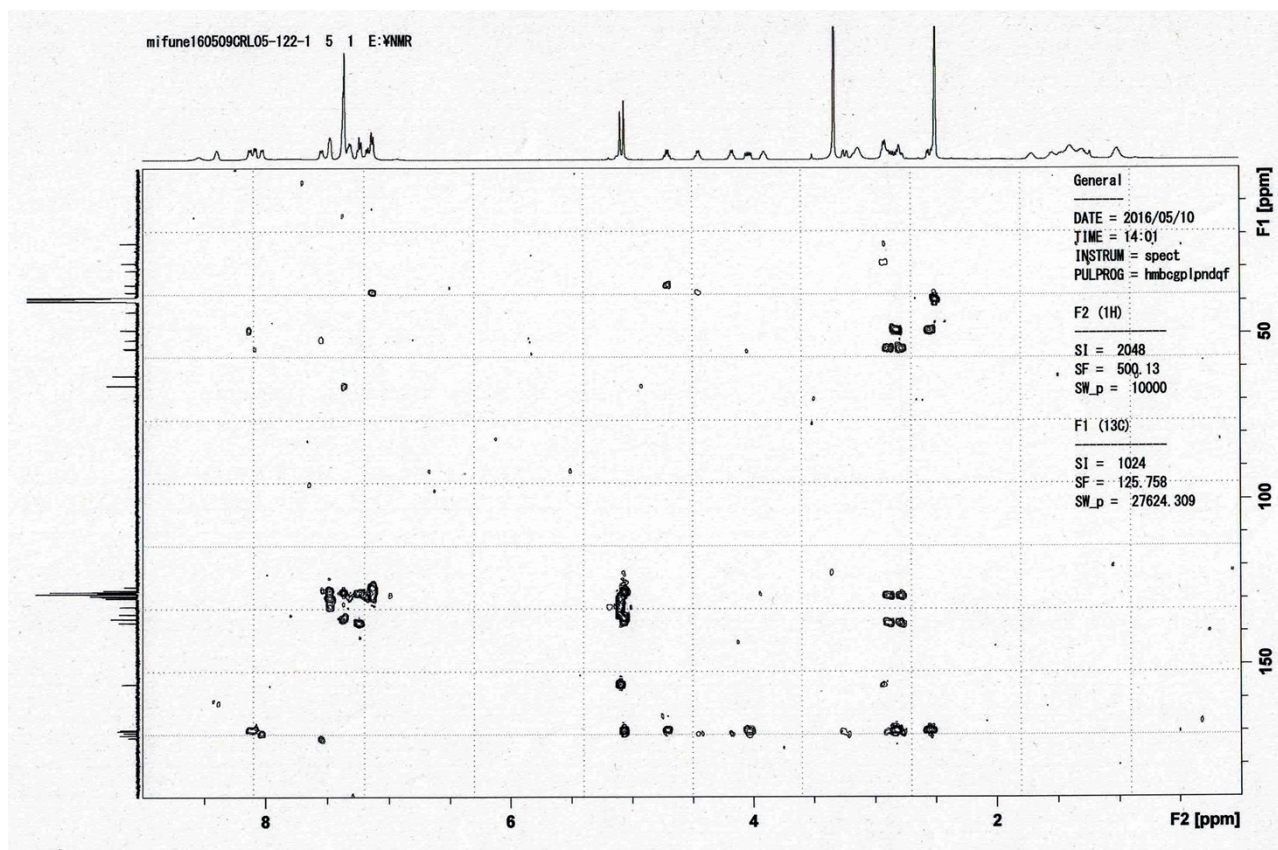

cyclic RGD peptide (25)

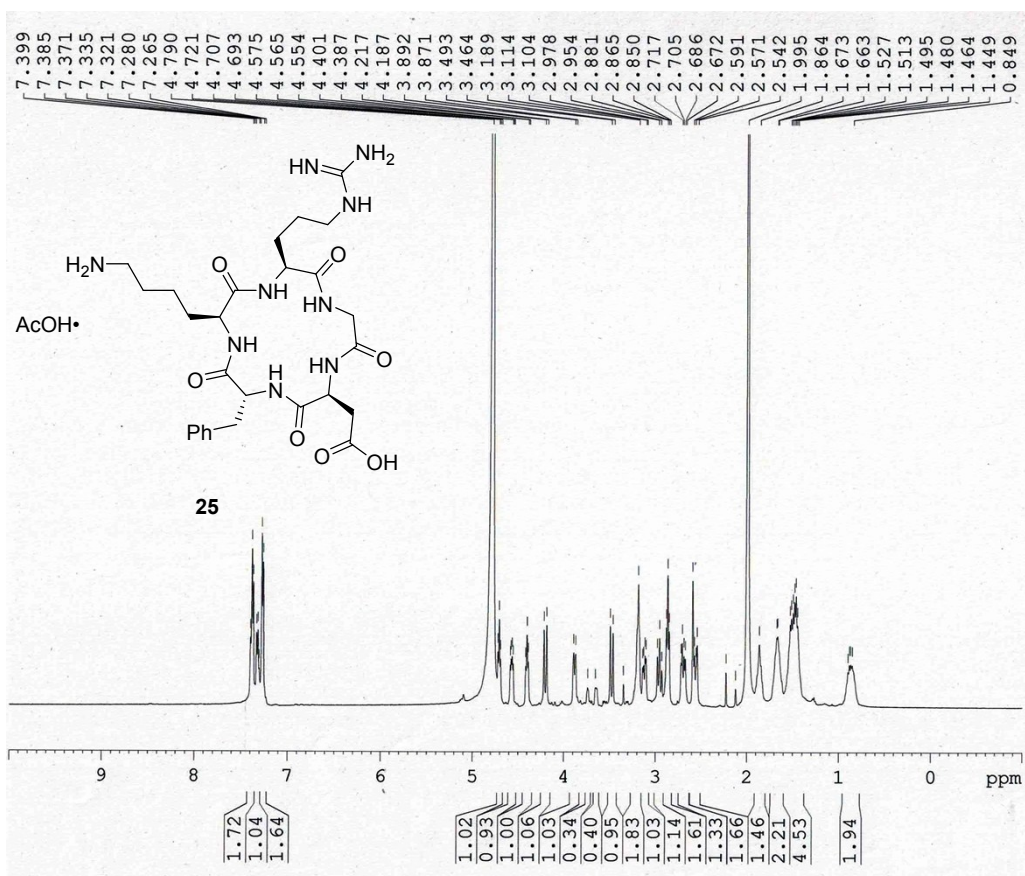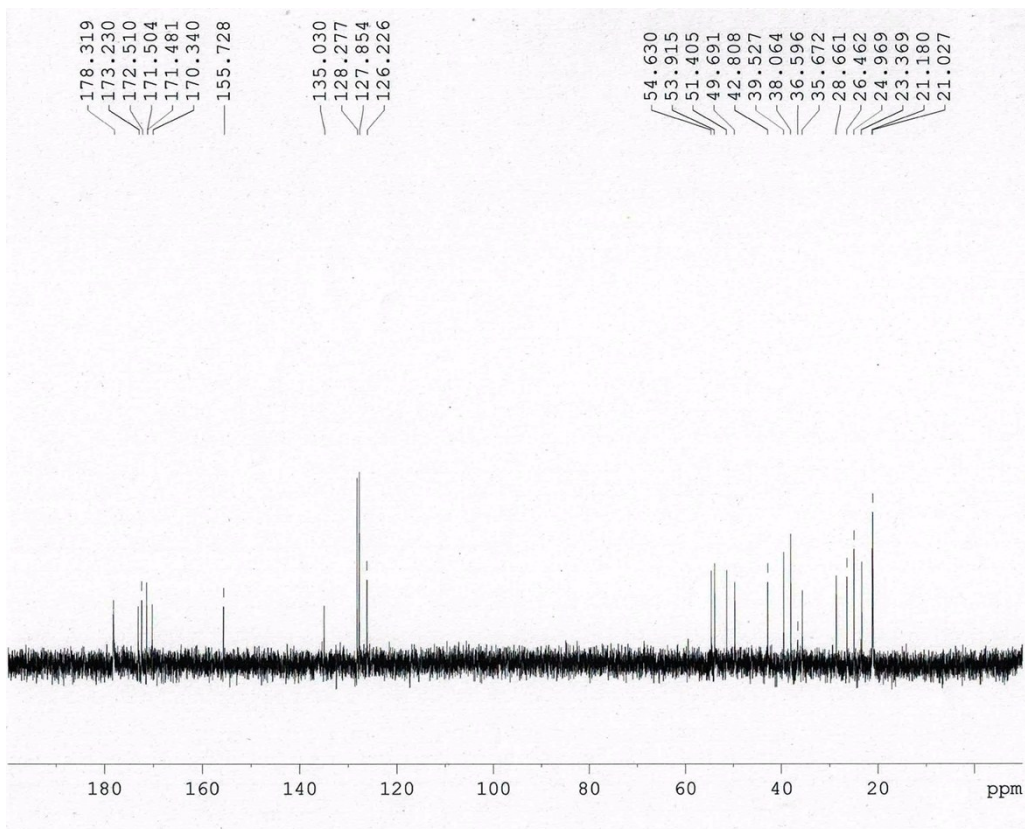

Supplement: c6ob02391f1.pdf [file c6ob02391f1.pdf]
